# Supplementary material for: Encapsulation of hydride by molecular main group metal clusters: manipulating the source and coordination sphere of the interstitial ion
Source: Royal Society of Chemistry journal article supplement (doi:10.1039/b612782g), 2006-01-01
Supplement: b612782g.pdf [file b612782g.pdf]

## *Supplementary Data*

### **Encapsulation of hydride by molecular main group metal clusters: manipulating the source and coordination sphere of the interstitial ion.**

Sally R. Boss,<sup>a</sup> Martyn P. Coles,<sup>b</sup> Vicki Eyre-Brook,<sup>a</sup> Felipe García,<sup>a</sup> Robert Haigh,<sup>a</sup> Peter B. Hitchcock,<sup>b</sup> Mary McPartlin,<sup>a</sup> James V. Morey,<sup>a</sup> Hiroshi Naka,<sup>c</sup> Paul R. Raithby,<sup>d</sup> Hazel A. Sparkes,<sup>d</sup> Christopher W. Tate<sup>a</sup> and Andrew E. H. Wheatley\*<sup>a</sup>

<sup>a</sup>*Department of Chemistry, University of Cambridge, Lensfield Road, Cambridge, CB2 1EW, U. K.; Fax: +44 (0)1223 336362; Tel: +44 (0)1223 763122; email: aehw2@cam.ac.uk.*

<sup>b</sup>*The Chemical Laboratories, University of Sussex, Brighton, BN1 9QJ, U. K.*

<sup>c</sup>*Graduate School of Pharmaceutical Sciences, Tohoku University, Aobayama, Aoba-ku, Sendai 980-8578, Japan.*

<sup>d</sup>*Department of Chemistry, University of Bath, Claverton Down, Bath, BA2 7AY, U. K.*

*Synthesis of  $[\{Me-4-C_6H_4(2-C_5H_4N)N\}_6HLi_8]^+ [(Bu^t_2AlMe_2)_2Li]^- \cdot PhMe$  **5**.*

$Me_3Al$  (0.5 ml, 2.0 M in toluene, 1.0 mmol) was added to a solution of (*N*-2-pyridyl)-4-methylaniline (0.18 g, 1.0 mmol) in toluene (2 ml) at room temperature under  $N_2$  and the mixture was stirred until reaction subsided.  $Bu^tLi$  (0.88 ml, 1.7 M in pentane, 1.5 mmol) was added at  $-78^\circ C$  and the mixture allowed to warm to room temperature whereupon a yellow solution formed. Crystals of **5** deposited after 24 h. at this temperature. Yield 48 mg, 19 % (based on  $Bu^tLi$ ), m. p. 256-258  $^\circ C$ . Found, C 72.84, H 7.66, N 11.52 %. Calcd. for  $C_{92}H_{115}Al_2Li_9N_{12}$  C 73.40, H 7.70, N 11.16 %.  $^1H$  NMR spectroscopy (400 MHz,  $d_8$ -thf),  $\delta$  7.66 (m, 6H, 6- $C_5H_4N$ ), 6.98 (m, 6H, 4- $C_5H_4N$ ), 6.90 (d, 12H, 3,5- $C_6H_4$ ), 6.87 (d, 12H, 2,6- $C_6H_4$ ), 6.57 (dd, 6H, 3- $C_5H_4N$ ), 5.92 (ddd, 6H, 5- $C_5H_4N$ ), 2.20 (s, 18H, 4-Me), 0.77 (m, 36H,  $Bu^t$ ),  $-1.32$  (sext., 12H,  $^2J_{HAl} = 5.9$  Hz, AlMe).  $^{13}C$  NMR spectroscopy (100 MHz,  $d_8$ -thf),  $\delta$  166.6 (2- $C_5H_4N$ ), 150.7 (1-Ph), 148.5 (6- $C_5H_4N$ ), 136.9 (4- $C_5H_4N$ ), 129.7 (3,5- $C_6H_4$ ), 126.8 (2,6- $C_6H_4$ ), 121.8 (4- $C_6H_4$ ), 107.2 (3- $C_5H_4N$ ), 106.7 (5- $C_5H_4N$ ), 33.3 ( $Bu^t$ ), 20.9 ( $C_6H_4Me$ ).  $^7Li$  NMR spectroscopy (155 MHz,  $d_8$ -thf),  $\delta$   $-0.65$  (s).

*Crystal data for 5.*

$C_{95}H_{118.5}Al_2Li_9N_{12}$ ,  $M = 1544.94$ , triclinic, space group  $P\bar{1}$ ,  $a = 15.288(3)$ ,  $b = 17.861(4)$ ,  $c = 18.576(4)$  Å,  $\alpha = 89.91(3)$ ,  $\beta = 79.01(3)$ ,  $\gamma = 71.23(3)^\circ$ ,  $V = 4704.8(17)$  Å<sup>3</sup>,  $Z = 2$ ,  $\rho_{calcd} = 1.091$  g cm<sup>-3</sup>, Mo- $K_\alpha$  radiation,  $\lambda = 0.71073$  Å,  $\mu = 0.080$  mm<sup>-1</sup>,  $T = 150(2)$ K. 53192 data (16488 unique,  $R_{int} = 0.0347$ ,  $\theta < 25.04^\circ$ ) were collected on a Nonius Kappa CCD diffractometer. The structure was solved by direct methods and refined by full-matrix least-squares on  $F^2$  values of all data (G.M. Sheldrick, SHELX-97, Program for Crystal Structure Refinement, University of Göttingen, 1997) to give  $wR2 = \{\Sigma[w(F_o^2 - F_c^2)^2] / \Sigma[w(F_o^2)^2]\}^{1/2} = 0.1745$ , conventional  $R = 0.0611$  on  $F$  values of 13943 reflections with  $F^2 > 2\sigma(F^2)$ , GoF = 1.082, 1090 parameters. Residual electron density extrema  $\pm 0.98$  eÅ<sup>-3</sup>. The asymmetric unit contains a  $[(Bu^t_2AlMe_2)_2Li]^-$  anion and two structurally similar half molecules of the  $[\{Me-4-C_6H_4(2-C_5H_4N)N\}_6HLi_8]^+$  cation, each sitting on a crystallographic centre of symmetry coincident with the interstitial hydride, and also a disordered toluene molecule.

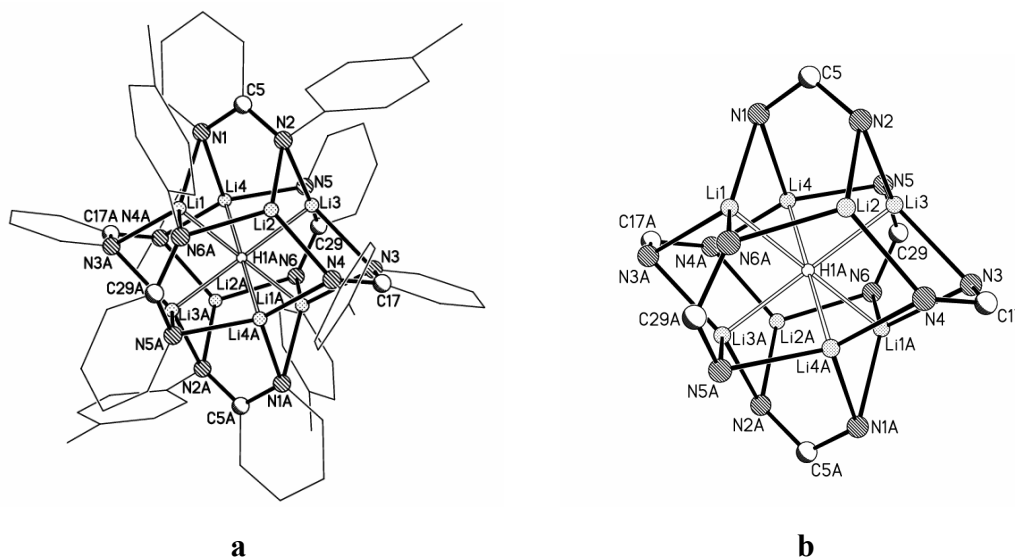

Figure S1 Structure of a) the  $[\{\text{Me-4-C}_6\text{H}_4(2\text{-C}_5\text{H}_4\text{N})\text{N}\}_6\text{HLi}_8]^+$  ion in **5**, and b) the cation core. H-atoms (except H1A) and lattice toluene molecule omitted.

Table S1 Selected bond lengths (Å) and angles (°) for **5**.

|         |          |              |           |
|---------|----------|--------------|-----------|
| H1A–Li1 | 2.007(4) | N3–Li3       | 2.053(4)  |
| H1A⋯Li2 | 2.861(4) | N5–Li3       | 2.144(4)  |
| H1A–Li3 | 2.024(4) | N1–Li4       | 2.129(4)  |
| H1A–Li4 | 2.008(4) | N4A–Li4      | 2.018(4)  |
| N1–Li1  | 2.058(4) | N5–Li4       | 2.042(4)  |
| N3A–Li1 | 2.131(4) | Li1–N1–Li4   | 73.35(16) |
| N6A–Li1 | 2.005(4) | Li2–N2–Li3   | 82.73(17) |
| N2–Li2  | 2.058(4) | Li1A–N3–Li3  | 74.38(16) |
| N4–Li2  | 2.053(4) | Li2–N4–Li4A  | 83.11(17) |
| N6A–Li2 | 2.065(4) | Li3–N5–Li4   | 74.06(16) |
| N2–Li3  | 2.000(4) | Li1A–N6–Li2A | 82.75(17) |

*Crystal data for 8.*

$C_{104}H_{194}B_2Li_{16}N_{36}$ ,  $M = 2081.61$ , monoclinic, space group  $P2(1)/n$ ,  $a = 17.486(4)$ ,  $b = 15.323(3)$ ,  $c = 23.014(5)$  Å,  $\beta = 97.66(3)^\circ$ ,  $V = 6111(2)$  Å<sup>3</sup>,  $Z = 2$ ,  $\rho_{\text{calcd}} = 1.131$  g cm<sup>-3</sup>, Mo- $K_\alpha$  radiation,  $\lambda = 0.71073$  Å,  $\mu = 0.068$  mm<sup>-1</sup>,  $T = 180(2)$ K. 19728 data (5990 unique,  $R_{\text{int}} = 0.0761$ ,  $\theta < 20.50^\circ$ ) were collected on a Nonius Kappa CCD diffractometer. The structure was solved by direct methods and refined by full-matrix least-squares on  $F^2$  values of all data (G.M. Sheldrick, SHELX-97, Program for Crystal Structure Refinement, University of Göttingen, 1997) to give  $wR2 = \{\Sigma[w(F_o^2 - F_c^2)^2] / \Sigma[w(F_o^2)]\}^{1/2} = 0.2370$ , conventional  $R = 0.0783$  on  $F$  values of 3796 reflections with  $F^2 > 2\sigma(F^2)$ , GoF = 1.044, 720 parameters. Residual electron density extrema  $\pm 0.57$  eÅ<sup>-3</sup>.

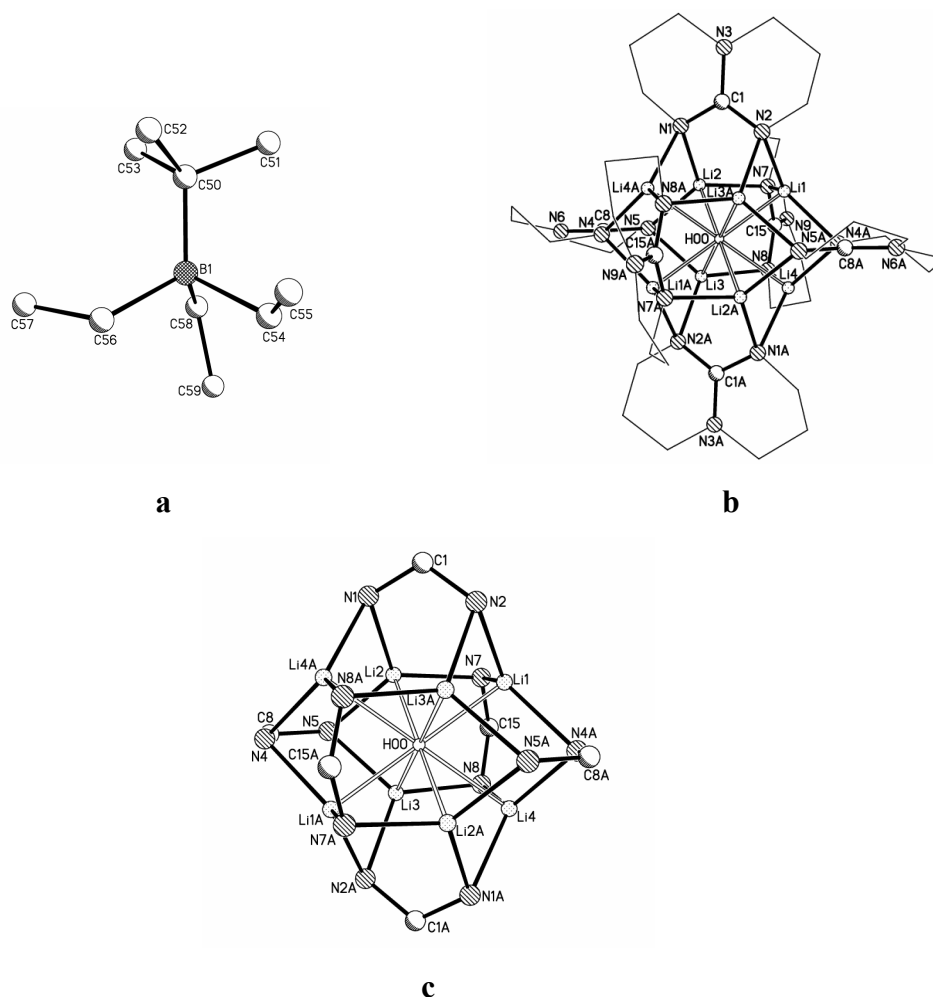

Figure S2 Structure of a) the borate anion and b) the  $[hpp_6HLi_8]^+$  ion in **8**, and c) the cation core. H-atoms (except H00) omitted.

Table S2 Selected bond lengths (Å) and angles (°) for **8**.

|         |           |              |           |
|---------|-----------|--------------|-----------|
| H00–Li1 | 2.135(9)  | N5–Li3       | 2.034(9)  |
| H00–Li2 | 2.101(9)  | N8–Li3       | 2.025(10) |
| H00–Li3 | 2.065(8)  | N1A–Li4      | 2.023(10) |
| H00–Li4 | 2.332(9)  | N4A–Li4      | 1.997(10) |
| N2–Li1  | 2.010(9)  | N8–Li4       | 2.000(9)  |
| N4A–Li1 | 2.048(10) | Li2–N1–Li4A  | 76.9(4)   |
| N7–Li1  | 1.971(9)  | Li1–N2–Li3A  | 75.6(4)   |
| N1–Li2  | 2.023(9)  | Li1A–N4–Li4A | 78.1(4)   |
| N5–Li2  | 2.026(10) | Li2–N5–Li3   | 74.8(4)   |
| N7–Li2  | 2.047(10) | Li1–N7–Li2   | 75.5(4)   |
| N2A–Li3 | 2.007(9)  | Li3–N8–Li4   | 77.5(4)   |

*Synthesis of [tmeda<sub>2</sub>Li]<sup>+</sup>[Et<sub>3</sub>BH]<sup>−</sup> **9**.*

A solution of hppH (0.139 g, 1.0 mmol) in toluene (1.2 ml) was treated with Et<sub>3</sub>B (1.0 ml, 1.0 M in toluene, 1.0 mmol) under N<sub>2</sub> at −78 °C. Reaction with Bu<sup>t</sup>Li (0.88 ml, 1.7 M in hexanes, 1.5 mmol) gave a suspension that was left to reach room temperature. The addition of tmeda (0.3 ml, 2.0 mmol) afforded a thick white slurry, which was heated to reflux and filtered hot. Storage of the resultant solution at +5 °C for 2 d yielded **9** as colourless crystals. Yield 46 mg, 14 % (based on tmeda), m. p. decomp. from 60 °C (trace solid residue melts at 160-164 °C). Satisfactory elemental analysis not possible, presumably due to unidentified [hpp]<sup>−</sup> contamination (see NMR, below). <sup>1</sup>H NMR spectroscopy (500 MHz, *d*<sub>6</sub>-dmsO), δ 3.04 (t, 2H, trace [hpp]<sup>−</sup> NCH<sub>2</sub>), 2.99 (t, 2H, trace [hpp]<sup>−</sup> NCH<sub>2</sub>), 2.28 (s, 8H, tmeda NCH<sub>2</sub>), 2.12 (s, 24H, tmeda NMe), 1.74 (quint., 2H, trace [hpp]<sup>−</sup> CH<sub>2</sub>), 0.61 (m, 9H, BCH<sub>2</sub>Me), −0.14 (m, 6H, MeCH<sub>2</sub>B). <sup>11</sup>B NMR spectroscopy (160 MHz, *d*<sub>6</sub>-dmsO, ref. F<sub>3</sub>B·OEt<sub>2</sub>/*d*-chloroform) δ −13.09 (d, <sup>1</sup>J<sub>BH</sub> = 74.6 Hz). {<sup>1</sup>H} <sup>11</sup>B NMR spectroscopy (160 MHz, *d*<sub>6</sub>-dmsO, ref. F<sub>3</sub>B·OEt<sub>2</sub>/*d*-chloroform) δ −13.06 (s). <sup>7</sup>Li NMR spectroscopy (194 MHz, *d*-dmsO, ref. ClLi/D<sub>2</sub>O) δ −1.17 (s).

Crystal data for **10** (see Table 4).

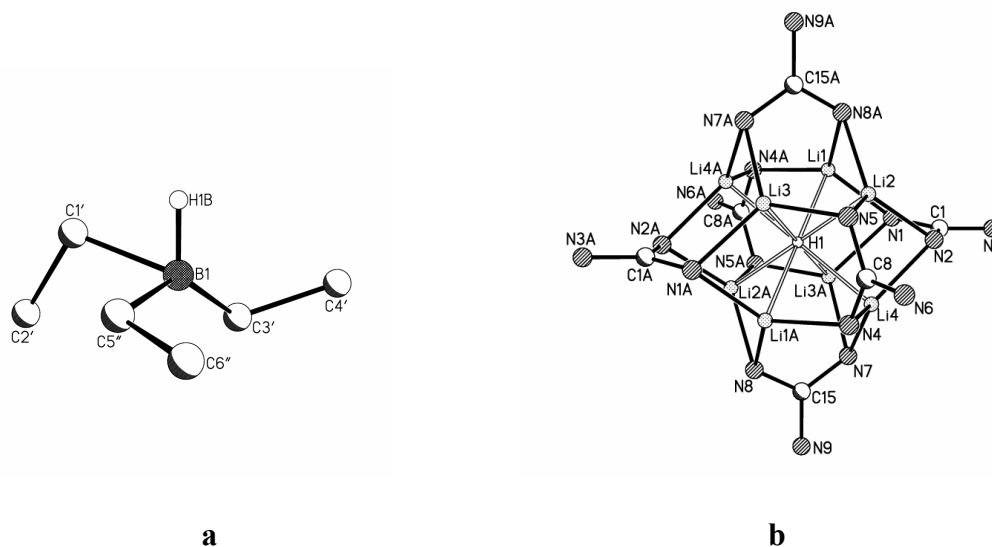

Figure S3 Structure of a) the borate anion and b) core of the  $[\text{hpp}_6\text{HLi}_8]^+$  ion in **10**. H-atoms (except H1B and H1),  $\text{CH}_2$  components of the  $[\text{hpp}]^-$  ligands and Et-disorder in the borate anion omitted.

Table S3 Selected bond lengths (Å) and angles (°) for **10**.

|         |          |              |          |
|---------|----------|--------------|----------|
| H1–Li1  | 2.242(7) | N5–Li3       | 2.002(7) |
| H1–Li2  | 2.072(6) | N7A–Li3      | 2.015(7) |
| H1–Li3  | 2.190(6) | N2–Li4       | 2.025(6) |
| H1–Li4  | 2.150(6) | N4–Li4       | 2.025(6) |
| N1–Li1  | 2.003(6) | N7–Li4       | 1.991(7) |
| N4A–Li1 | 2.011(7) | Li1–N1–Li3A  | 78.2(3)  |
| N8A–Li1 | 2.018(7) | Li2–N2–Li4   | 75.9(3)  |
| N2–Li2  | 1.997(6) | Li1A–N4–Li4  | 77.5(3)  |
| N5–Li2  | 2.023(6) | Li2–N5–Li3   | 75.3(3)  |
| N8A–Li2 | 2.010(6) | Li3A–N7–Li4  | 77.3(3)  |
| N1A–Li3 | 2.045(7) | Li1A–N8–Li2A | 76.1(3)  |

Crystal data for **12** (see Table 4).

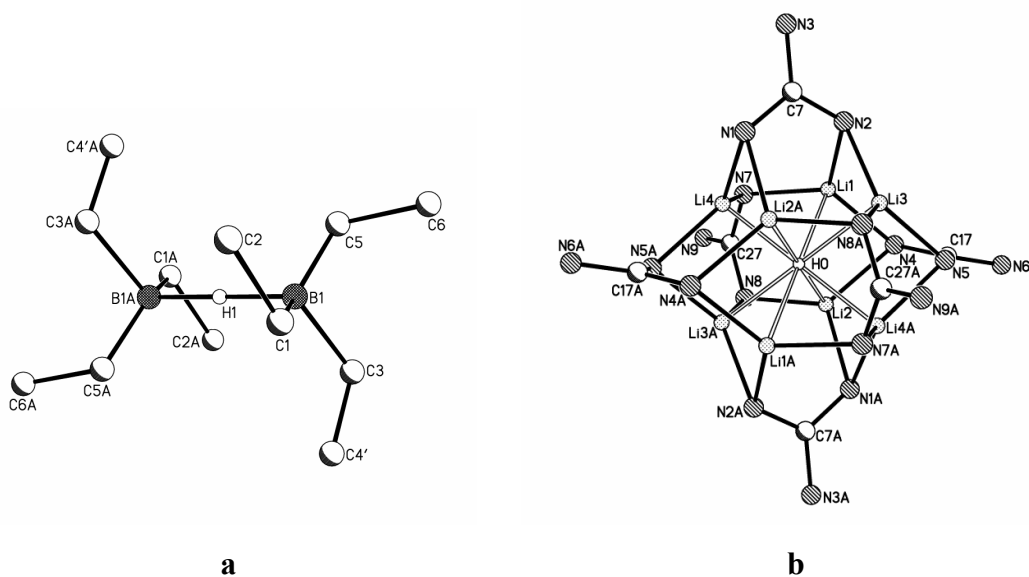

Figure S4 Structure of a) the borate anion and b) core of the  $[\text{hpp}_6\text{HLi}_8]^+$  ion in **12**. H-atoms (except H1 and H0),  $\text{CH}_2$  components of the  $[\text{hpp}]^-$  ligands and Et-disorder in the anion omitted for clarity.

Table S4 Selected bond lengths (Å) and angles (°) for **12**.

|         |          |             |          |
|---------|----------|-------------|----------|
| H0–Li1  | 2.325(7) | N5–Li3      | 1.996(7) |
| H0–Li2  | 2.073(6) | N8A–Li3     | 2.048(7) |
| H0–Li3  | 2.165(5) | N1–Li4      | 2.038(7) |
| H0–Li4  | 2.068(6) | N5A–Li4     | 2.027(7) |
| N2–Li1  | 2.003(7) | N7–Li4      | 2.015(7) |
| N4–Li1  | 1.994(7) | Li2A–N1–Li4 | 74.8(3)  |
| N7–Li1  | 2.011(7) | Li1–N2–Li3  | 77.8(3)  |
| N1A–Li2 | 2.006(7) | Li1–N4–Li2  | 76.4(3)  |
| N4–Li2  | 2.027(7) | Li3–N5–Li4A | 76.9(3)  |
| N8–Li2  | 1.993(7) | Li1–N7–Li4  | 77.4(3)  |
| N2–Li3  | 2.024(7) | Li2–N8–Li3A | 75.6(3)  |

### Theoretical Study

As a preliminary study, the effects of amine ligands were neglected and the reaction of Bu<sup>t</sup>Li with Lewis acid was considered. Two possibilities were tested: direct hydride formation from Bu<sup>t</sup>Li and Lewis acids, and stepwise hydride formation *via* an intermediary *tert*-butyl 'ate complex (Scheme S1).

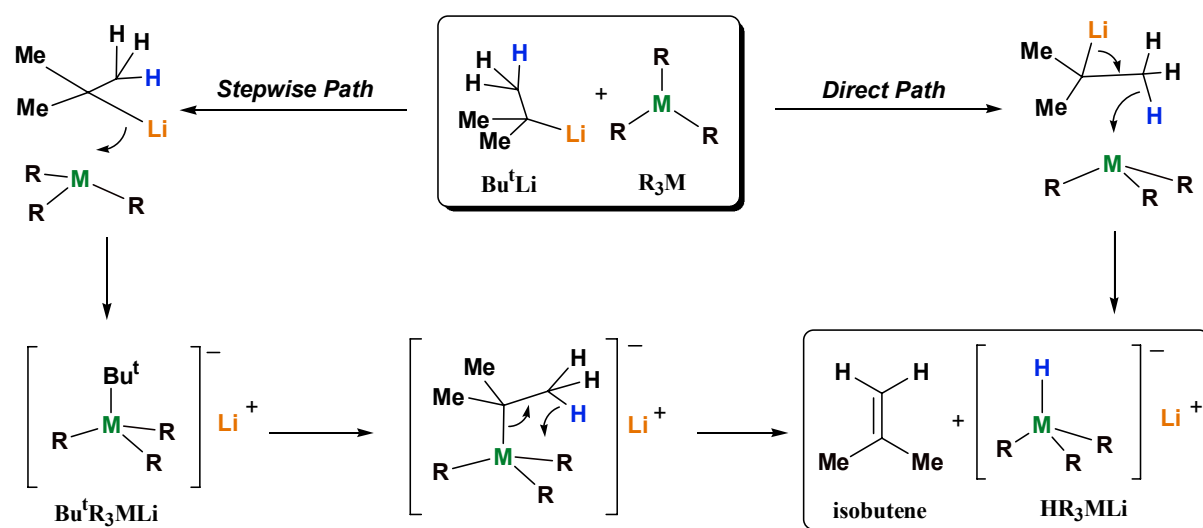

Scheme S1

Trimethylborane was employed as a model Lewis acid and its reaction with Bu<sup>t</sup>Li was tested at the B3LYP/6-31G\* level of theory. Though the potential energy surfaces were calculated in terms of all electron energy ( $\Delta E$ ), frequency analysis was conducted for all the stationary and transition points to consider Gibbs free energy ( $\Delta G$ ). Because the number of molecules changes in the course of the reactions, relative  $\Delta G$  was considered for discussions.

Two pathways for direct hydride formation and a single pathway was located for the stepwise route (Scheme S1 and Scheme 5). Energy diagrams for these pathways are shown in Figures S5 (plotted in  $\Delta E$ ) and S6 (plotted in  $\Delta G$ ). Optimized molecular structures are shown in Figure S7.

The optimized structure of the stationary point in [(Me<sub>3</sub>B)<sub>2</sub>H]<sup>-</sup> (*viz.* **12**) is shown in Fig. S8.



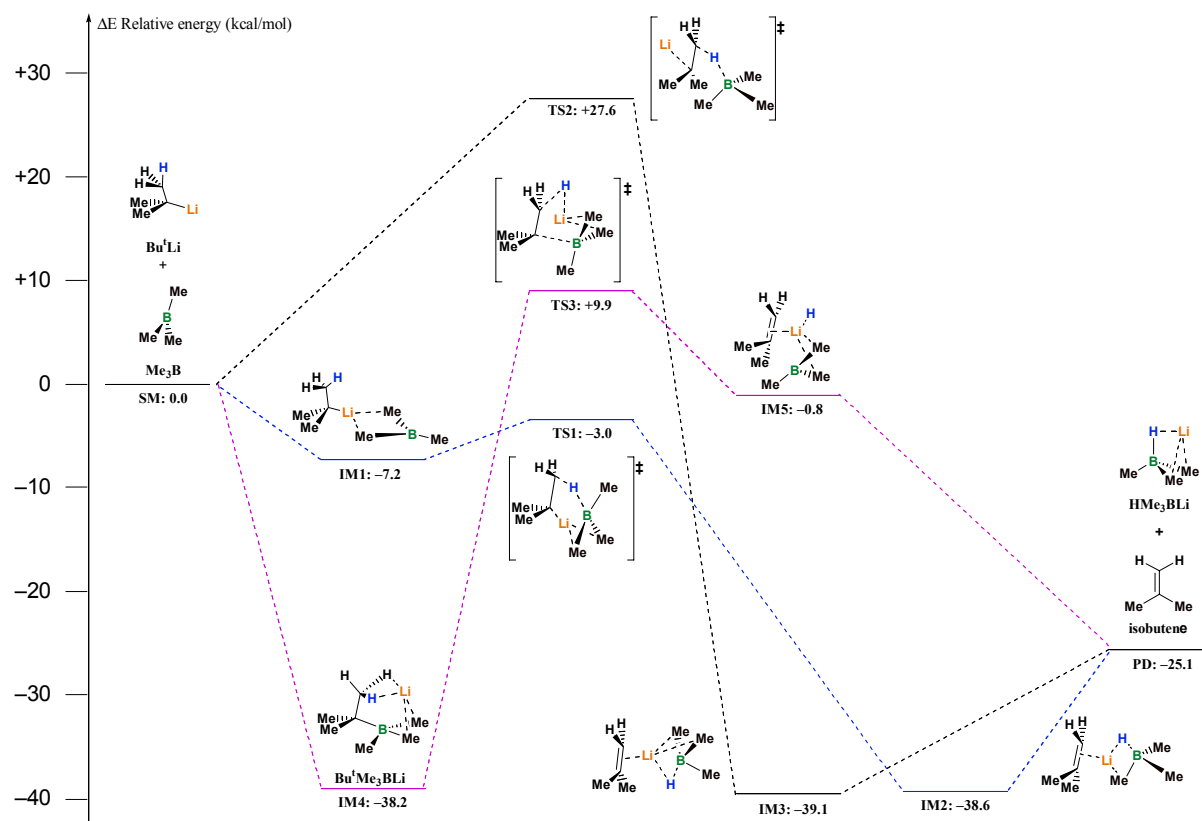

Figure S5 Reaction coordinates for borohydride formation from *t*-butyllithium and trimethylborane. Energy values ( $\Delta E$ ) are relative to SM and are shown in kcal/mol.

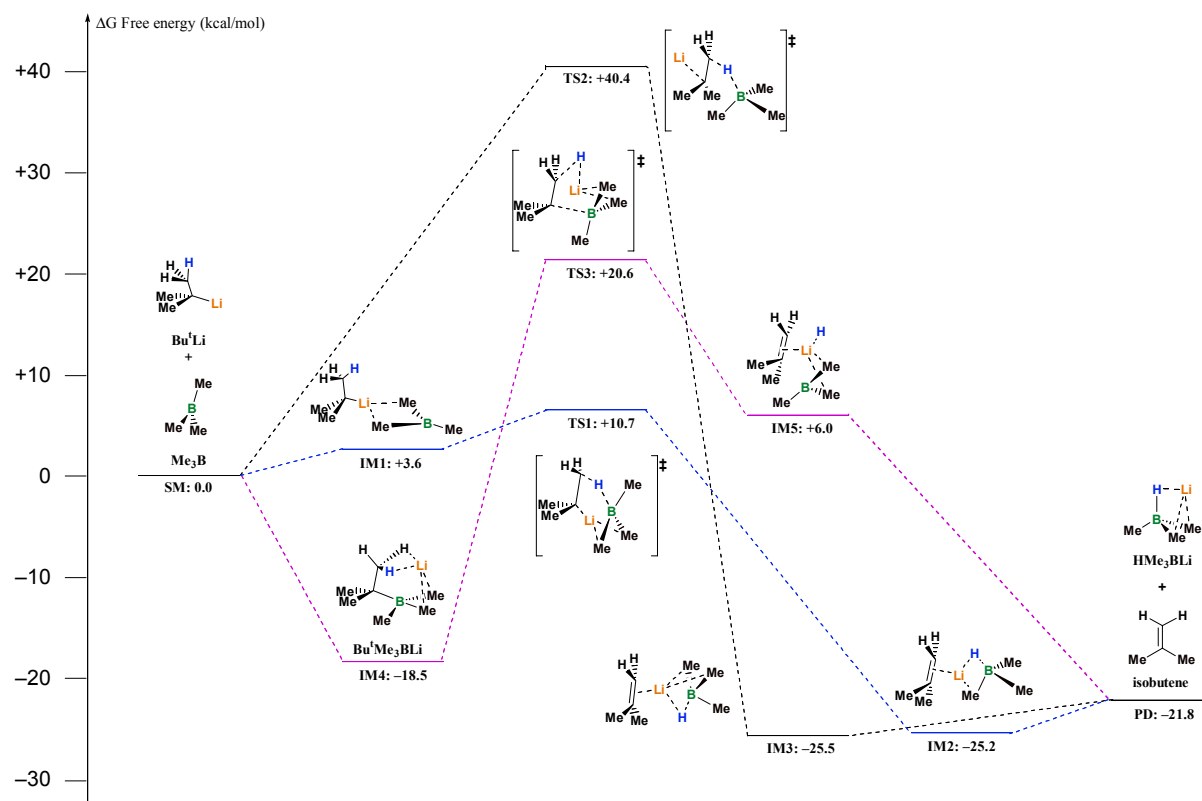

Figure S6 Reaction coordinates for borohydride formation from *t*-butyllithium and trimethylborane. Gibbs free energy values ( $\Delta G$ ) are relative to SM and are shown in kcal/mol.

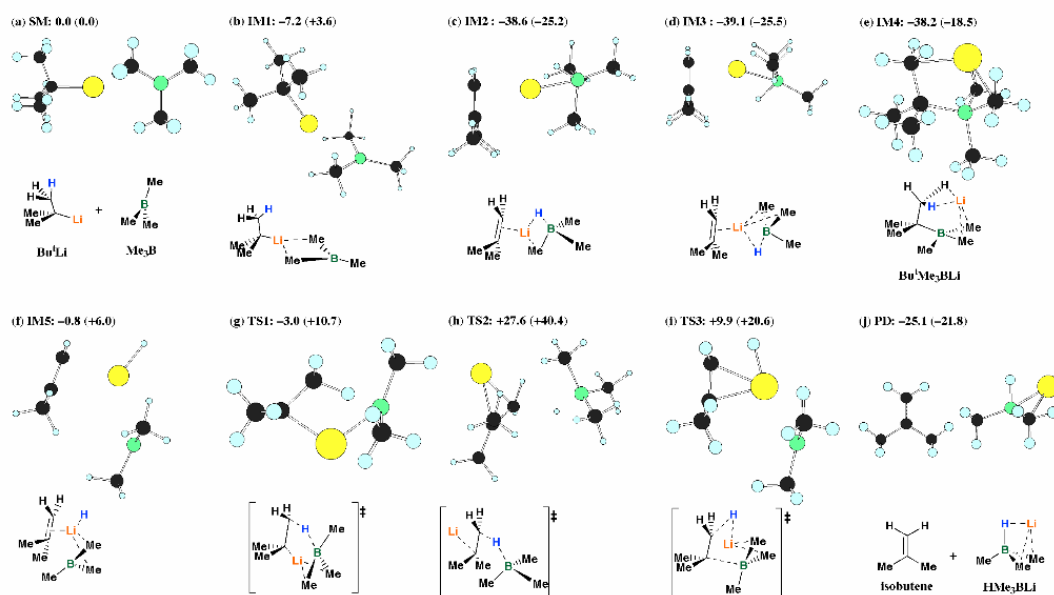

Figure S7 Optimized structures of the stationary points and transition states. Energy values ( $\Delta E$ ) and Gibbs free energy values ( $\Delta G$ ) (in parenthesis) are relative to SM and are shown in kcal/mol.

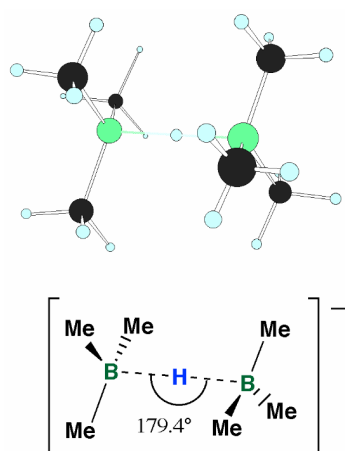

Figure S8 Optimized structure of the stationary point in  $[(\text{Me}_3\text{B})_2\text{H}]^-$ . This structure was found to be 6.3 kcal/mol more stable than that modeled with a frozen B–H–B angle of  $127^\circ$ .

Calculations were carried out with a Gaussian 03 (G03) program package (M. J. Frish, *et al.* *Gaussian 03*, revision c.01; Gaussian, Inc.; Wallingford, CT, 2004) using the hybrid density functional method based on Becke's three-parameter exchange function and the Lee-Yang-Parr non-local correlation functional (B3LYP) (A. D. Becke, *Phys. Rev.*, 1998, **A38**, 3098; A. D. Becke, *J. Chem. Phys.*, 1993, **98**, 1372; A. D. Becke, *J. Chem. Phys.*, 1993, **98**, 5648; C.

Lee, W. Yang, R. G. Parr, *Phys. Rev.*, 1998, **B37**, 785). The 6-31G\* basis set was used for all atoms. Geometry optimizations and vibrational analyses were performed at the same level. All stationary points were optimized without any symmetry assumptions and characterized by normal coordinate analysis at the same level of theory (the number of imaginary frequencies, NIMAGs, was 0 for minima and 1 for transition states, TSs).
